# Supplementary material for: Lecithin-Stabilized Polymeric Micelles (LsbPMs) for Delivering Quercetin: Pharmacokinetic Studies and Therapeutic Effects of Quercetin Alone and in Combination with Doxorubicin
Source: PubMed Central journal article supplement (PMC6281656; doi:10.1038/s41598-018-36162-0), 2018-12-05
Supplement: 41598_2018_36162_MOESM1_ESM.pdf [file 41598_2018_36162_MOESM1_ESM.pdf]

## **Supplementary Information:**

### **Title of manuscript:**

Lecithin-Stabilized Polymeric Micelles ( $L_{sb}$ PMs) for Delivering Quercetin: Pharmacokinetic Studies and Therapeutic Effects of Quercetin Alone and in Combination with Doxorubicin

### **Authors:**

Chia-En Chang<sup>1\*</sup>, Chien-Ming Hsieh<sup>1\*</sup>, Sheng-Chin Huang<sup>1</sup>, Chia-Yu Su<sup>1</sup>, Ming-Thau Sheu<sup>1,2#</sup> and Hsiu-O Ho<sup>1#</sup>

\*The first two authors contributed equally to this work.

#The Corresponding two authors equally to this work.

Corresponding author: Hsiu-O Ho

Address: 250 Wuxing St. Taipei 11031, Taiwan

Telephone: 886-2-27361661 ext. 6126

Fax: 886-2-23771942

E-mail: [hsiuoho@tmu.edu.tw](mailto:hsiuoho@tmu.edu.tw)

### **Supplementary information includes:**

Supplemental information includes supplemental methods; two figures can be found with this article online.

## Experimental Methods

### Quantification of QUE in QUE-loaded $L_{sb}$ PMs

The encapsulated amount of QUE in QUE-loaded  $L_{sb}$ PMs was determined by an HPLC method. First, a supernatant solution of QUE-loaded  $L_{sb}$ PMs was filtered through 0.22- $\mu\text{m}$  filter paper. The solution (20  $\mu\text{l}$ ) was diluted with 980  $\mu\text{l}$  of methanol:H<sub>2</sub>O (6:4), and then determined through an HPLC method using an Inertsil<sup>®</sup> ODS-3 column (C18, 6  $\mu\text{m}$ , 4.6 x 150 mm; GL Sciences, Torrance, CA, USA). The column oven temperature was maintained at 40 °C. The mobile phase was methanol:0.025 M phosphate buffer (60:40, v/v). The flow rate was 1 mL/min. The detection wavelength was set to 375 nm, and the sample injection volume was 20  $\mu\text{L}$ . The QUE concentration was determined from the calibration curve, and the EE percentage (EE%) and DL percentage (DL%) were respectively calculated according to equations 1 and 2:

$$\text{EE}\% = \text{WM}/\text{WI} \times 100 \text{ and} \quad (1)$$

$$\text{DL}\% = \text{WM}/(\text{WP} + \text{WM}) \times 100; \quad (2)$$

where WM is the weight of the drugs in the micelles, WI is the weight of the initial feeding drug, and WP is the weight of the initial feeding polymers.

### In Vitro Release Studies

After being diluted to a concentration of 1 mg/mL, 1 ml of diluted free QUE (QUE dissolved in EtOH:Tween<sup>®</sup>80 at 1:1 to 40 mg/mL and then diluted with double-distilled water (DDW) to 6 mg/mL) and QUE-loaded  $L_{sb}$ PMs were placed in a dialysis bag (MWCO = 6000 Da) and immersed in 20 mL of 10 mM PBS (pH 7.4) containing 0.5% Tween 80 at 37 °C with shaking at 100 rpm. The incubation medium was replaced with fresh medium at predetermined intervals. The QUE concentration was determined by the HPLC method described above.

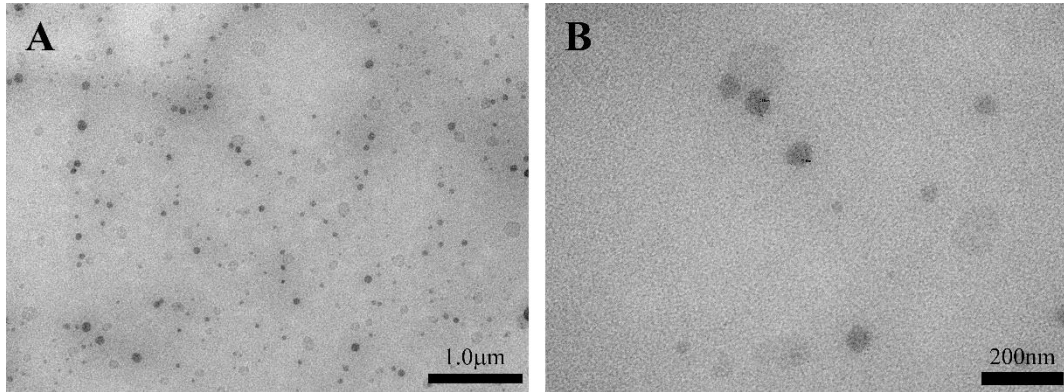

**Figure S1** TEM photographs of quercetin (QUE)-loaded lecithin-stabilized polymeric micelles ( $L_{sb}$ PMs) (QUE:TPGS:lecithin = 6:40:80, w/w/w) at (A) 12,000x and (B) 50,000x magnification.

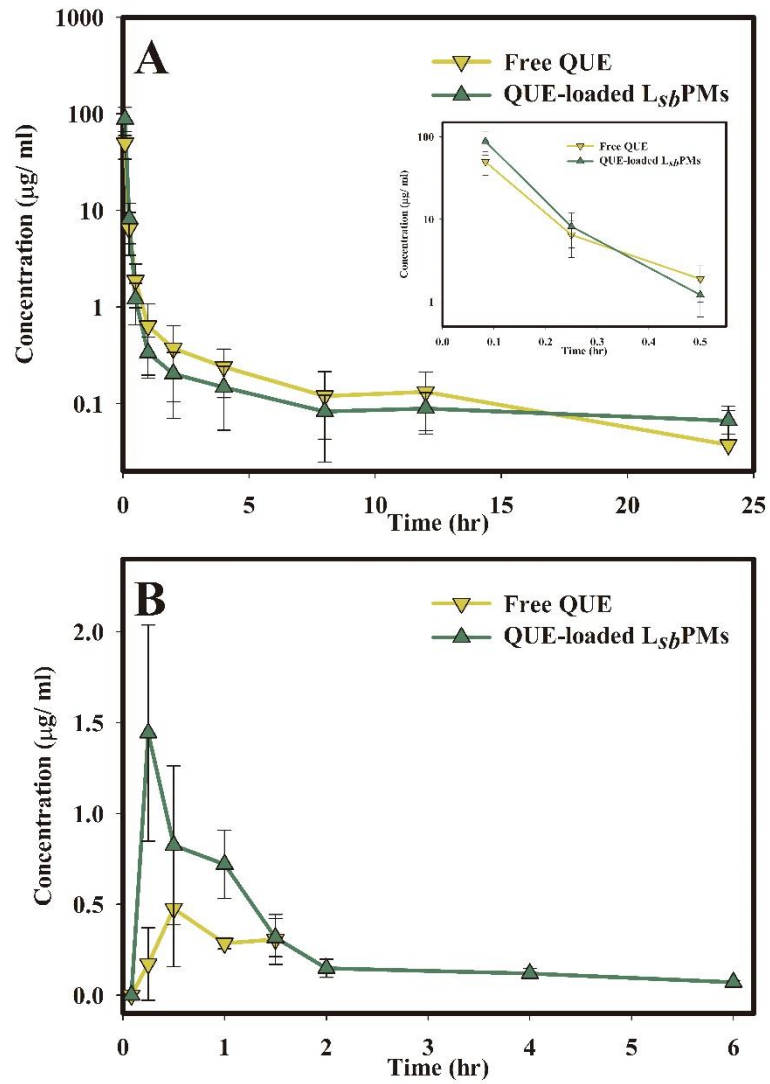

**Figure S2** Plasma concentration-time curves of quercetin (QUE) after (A) intravenous (50 mg/kg) and (B) oral (100 mg/kg) administration of QUE-loaded lecithin-stabilized polymeric micelles ( $L_{sb}PMs$ ) and free QUE to rats. Each point is shown as the mean  $\pm$  SD ( $n=5$ ).
